# Supplementary material
Source: PubMed Central journal article supplement (PMC3910866)
Supplement: AAC.01531-13_zac002142542so1.pdf [file AAC.01531-13_zac002142542so1.pdf]

## Supplemental Figures

### A - TMP-SXT

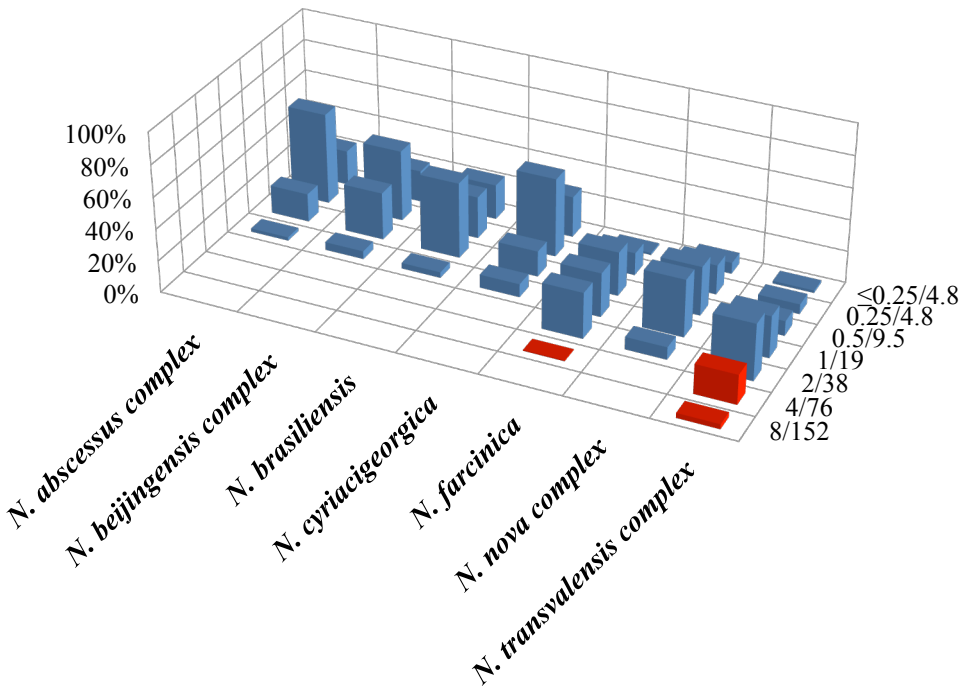

### B - Imipenem

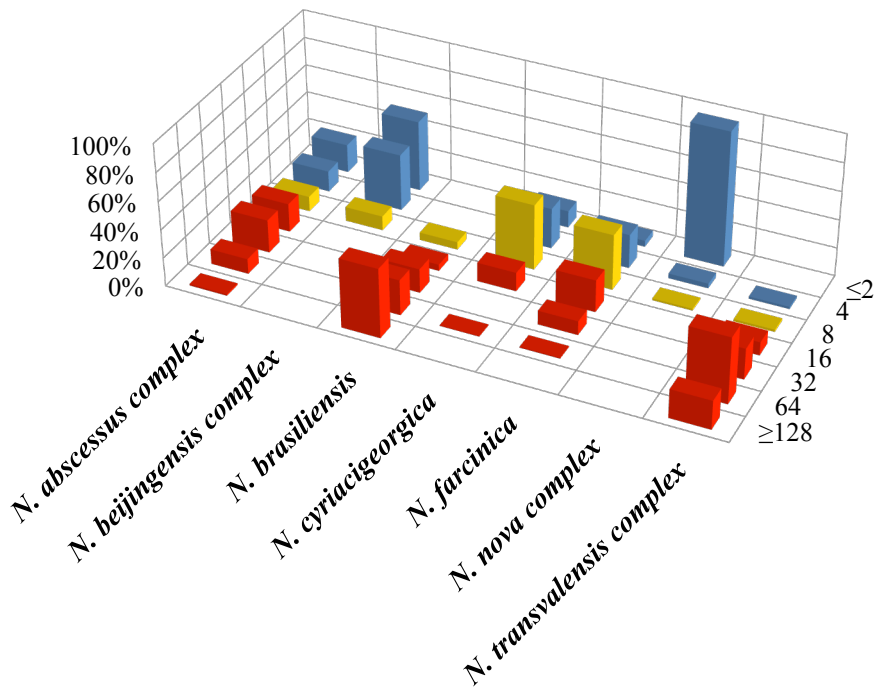

C - CTR

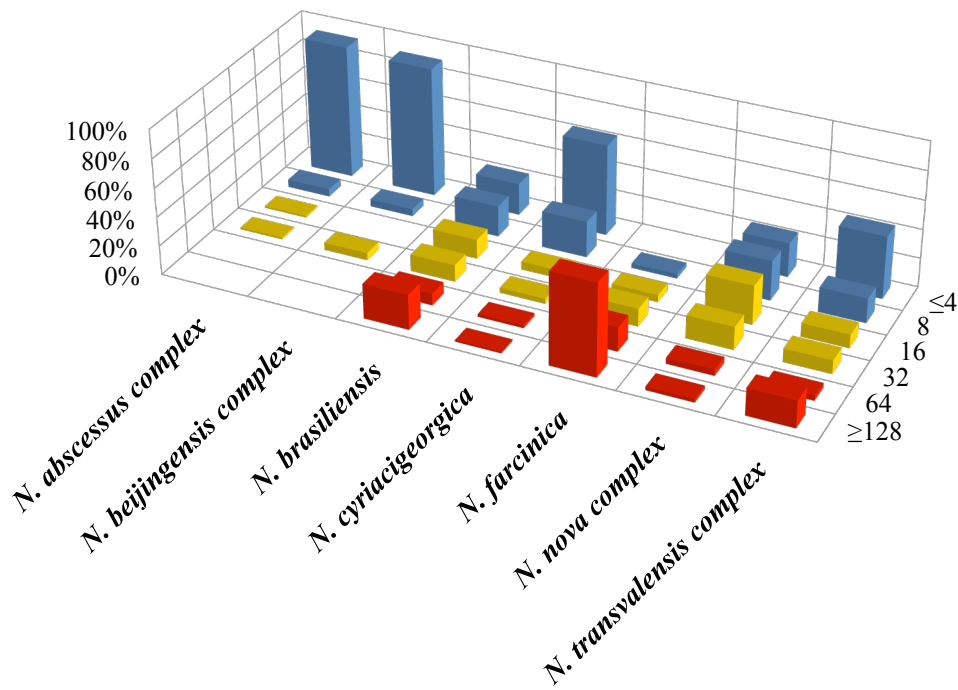

D - AMK

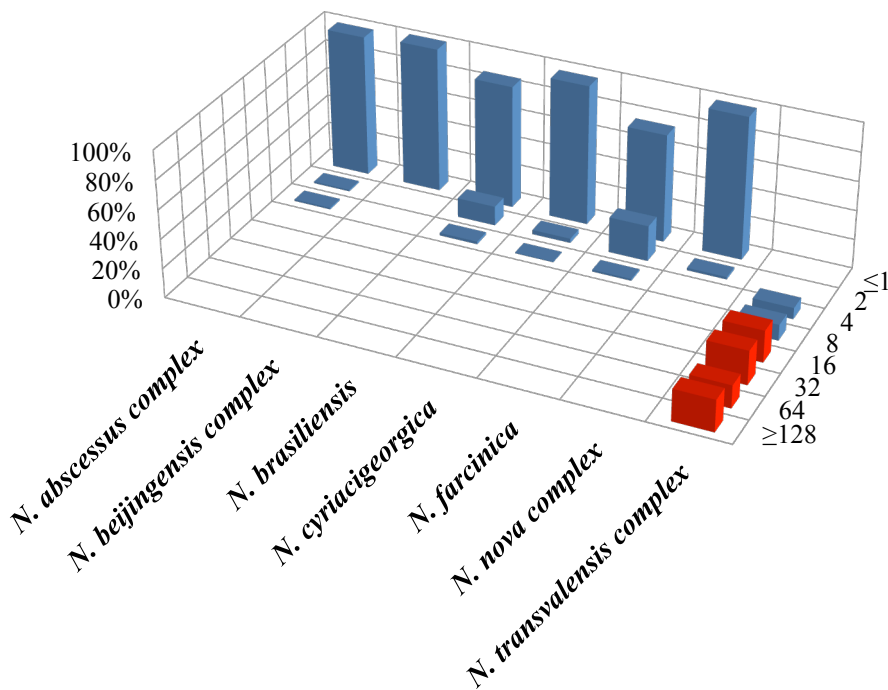

**Figure S1.** MIC distribution for the 7 most common *Nocardia* species. TMP-SXT - trimethoprim-sulfamethoxazole, IMI - imipenem, CTR - ceftriaxone, AMK – amikacin. Open bars – susceptible, grey bars – intermediate, black bars - resistant

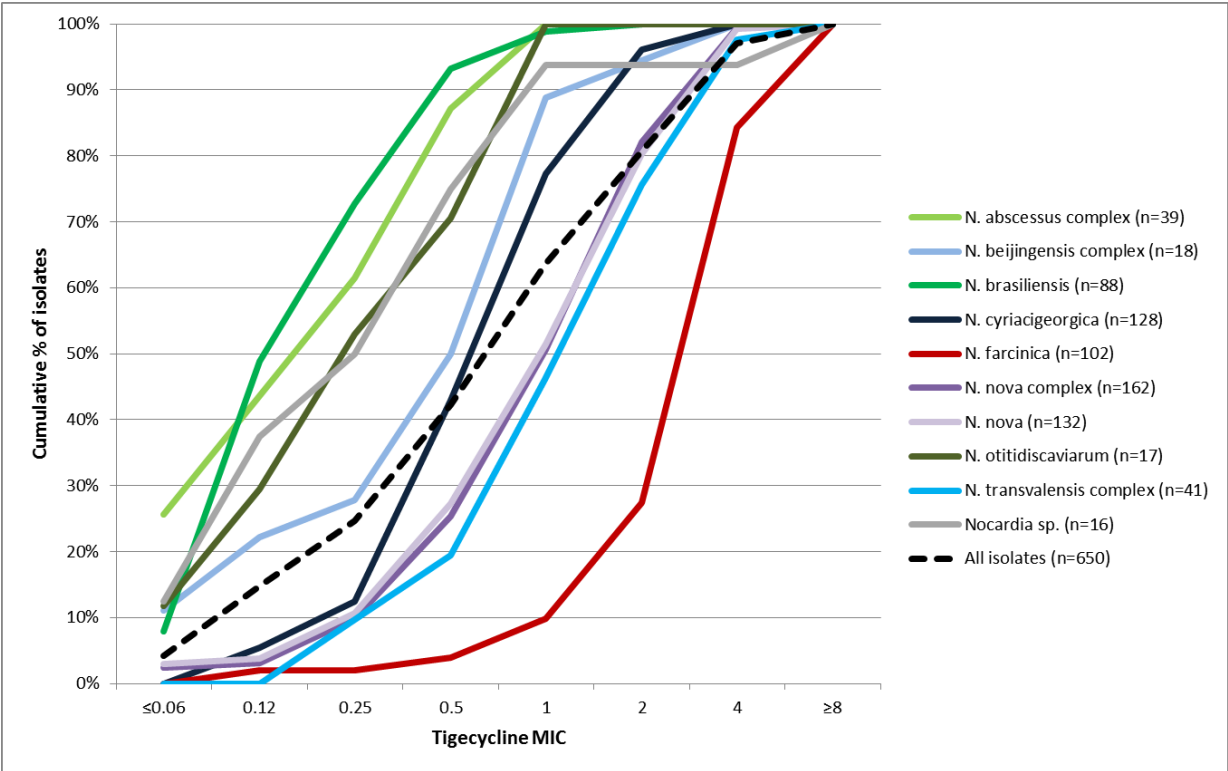

**Figure S2.** Cumulative proportion of isolates with a given tigecycline MIC for all species or complexes with greater than 10 isolates

**Supplemental Table.** Frequency distribution of *Nocardia* species identified by partial 16S sequencing during a 6-year period (2006-2011).

| <b>Identification</b>              | <b>Identified</b> |          | <b>AST available</b> |          | <b>Description</b> |
|------------------------------------|-------------------|----------|----------------------|----------|--------------------|
|                                    | <b>n</b>          | <b>%</b> | <b>n</b>             | <b>%</b> |                    |
| <i>N. nova</i> complex*            | 585               | 27.2     | 320                  | 55       |                    |
| <i>N. africana</i>                 |                   |          |                      |          | 2001               |
| <i>N. elegans</i>                  |                   |          |                      |          | 2005               |
| <i>N. kruczakiae</i>               |                   |          |                      |          | 2005               |
| <i>N. mikamii</i>                  |                   |          |                      |          | 2010               |
| <i>N. nova</i> **                  | 465               | 21.6     | 246                  | 53       | 1983               |
| <i>N. veterana</i>                 |                   |          |                      |          | 2001               |
| <i>N. cyriacigeorgica</i>          | 451               | 21.0     | 264                  | 59       | 2001               |
| <i>N. farcinica</i>                | 308               | 14.3     | 204                  | 66       | 1889               |
| <i>N. brasiliensis</i>             | 254               | 11.8     | 148                  | 59       | 1913               |
| <i>N. abscessus</i> complex*       | 196               | 9.1      | 110                  | 56       |                    |
| <i>N. abscessus</i>                |                   |          |                      |          | 2000               |
| <i>N. arthritidis</i>              |                   |          |                      |          | 2005               |
| <i>N. asiatica</i>                 |                   |          |                      |          | 2004               |
| <i>N. transvalensis</i> complex*   | 119               | 5.5      | 83                   | 70       |                    |
| <i>N. transvalensis</i>            |                   |          |                      |          | 1927               |
| <i>N. wallacei</i>                 |                   |          |                      |          | 2009               |
| <i>N. beijingensis</i> complex*    | 49                | 2.3      | 30                   | 61       |                    |
| <i>N. beijingensis</i>             |                   |          |                      |          | 2001               |
| <i>N. pneumoniae</i>               |                   |          |                      |          | 2004               |
| <i>N. otitidiscaviarum</i>         | 45                | 2.1      | 29                   | 64       | 1924               |
| <i>N. paucivorans</i>              | 21                | 1.0      | 11                   | 52       | 2000               |
| <i>N. pseudobrasiliensis</i>       | 18                | 0.8      | 13                   | 72       | 1996               |
| <i>N. puris</i>                    | 12                | 0.6      | 7                    | 58       | 2003               |
| <i>N. testacea</i>                 | 12                | 0.6      | 1                    | 8        | 2004               |
| <i>N. amikacinitolerans</i>        | 11                | 0.5      | 7                    | 64       | 2013               |
| <i>N. niigatensis</i>              | 9                 | 0.4      | 2                    | 22       | 2004               |
| <i>N. niwae</i>                    | 8                 | 0.4      | 6                    | 75       | 2011               |
| <i>N. rhamnosiphila</i>            | 6                 | 0.3      | 4                    | 67       | 2011               |
| <i>N. exalbida</i> complex*        | 5                 | 0.2      | 4                    | 80       |                    |
| <i>N. exalbida</i>                 |                   |          |                      |          | 2006               |
| <i>N. gamkensis</i>                |                   |          |                      |          | 2007               |
| <i>N. amamiensis</i>               | 4                 | 0.2      | 2                    | 50       | 2007               |
| <i>N. aobensis</i>                 | 4                 | 0.2      | 2                    | 50       | 2005               |
| <i>N. asteroides sensu stricto</i> | 4                 | 0.2      | 3                    | 75       | 1896               |
| <i>N. carnea</i>                   | 4                 | 0.2      | 2                    | 50       | 1913               |
| <i>N. higoensis</i> complex*       | 4                 | 0.2      | 2                    | 50       |                    |
| <i>N. higoensis</i>                |                   |          |                      |          | 2004               |
| <i>N. shimofusensis</i>            |                   |          |                      |          | 2004               |
| <i>N. blacklockiae</i>             | 3                 | 0.1      | 1                    | 33       | 2009               |
| <i>N. brevicatena</i>              | 2                 | 0.1      | 1                    | 50       | 1982               |
| <i>N. grenadensis</i>              | 2                 | 0.1      | 2                    | 100      | 2012               |
| <i>N. ignorata</i>                 | 2                 | 0.1      | 1                    | 50       | 2001               |
| <i>N. takedensis</i>               | 2                 | 0.1      | 1                    | 50       | 2005               |

|                            |      |      |      |     |      |
|----------------------------|------|------|------|-----|------|
| <i>N. vinacea</i>          | 2    | 0.1  | 1    | 50  | 2002 |
| <i>N. cerradoensis</i>     | 1    | 0.05 |      |     | 2003 |
| <i>N. cummidelens</i>      | 1    | 0.05 |      |     | 2001 |
| <i>N. flavorosea</i>       | 1    | 0.05 | 1    | 100 | 1998 |
| <i>N. iowensis</i>         | 1    | 0.05 |      |     | 2009 |
| <i>N. mexicana</i>         | 1    | 0.05 | 1    | 100 | 2006 |
| <i>N. neocaledoniensis</i> | 1    | 0.05 | 1    | 100 | 2004 |
| <i>N. thailandica</i>      | 1    | 0.05 | 1    | 100 | 2005 |
| <i>N. vermiculata</i>      | 1    | 0.05 | 1    | 100 | 2005 |
| <i>N. yamanashiensis</i>   | 1    | 0.05 | 1    | 100 | 2004 |
| Total                      | 2151 |      | 1267 | 59  |      |
| <i>Nocardia sp.</i>        | 47   |      | 32   | 68  |      |

Abbreviations: AST – antimicrobial susceptibility testing; description – year that the species was validly described (1)

\* Species belonging to this complex cannot be reliably distinguished by partial 16S sequencing

\*\* Frequency distribution of the species *N. nova* is provided independently from the larger *N.*

*nova* complex

## Reference

1. DSMZ. 2013. Bacterial Nomenclature Up-To-Date (Approved Lists, Validation Lists), Version June 2013; <http://www.dsmz.de/bacterial-diversity/prokaryotic-nomenclature-up-to-date.html>.
